# Supplementary material for: Phytosterol-Loaded Surface-Tailored Bioactive-Polymer Nanoparticles for Cancer Treatment: Optimization, In Vitro Cell Viability, Antioxidant Activity, and Stability Studies
Source: MDPI journal article supplement (doi:10.3390/gels8040219), 2022-04-02
Supplement: s1 [file s1]

## Supplementary Materials

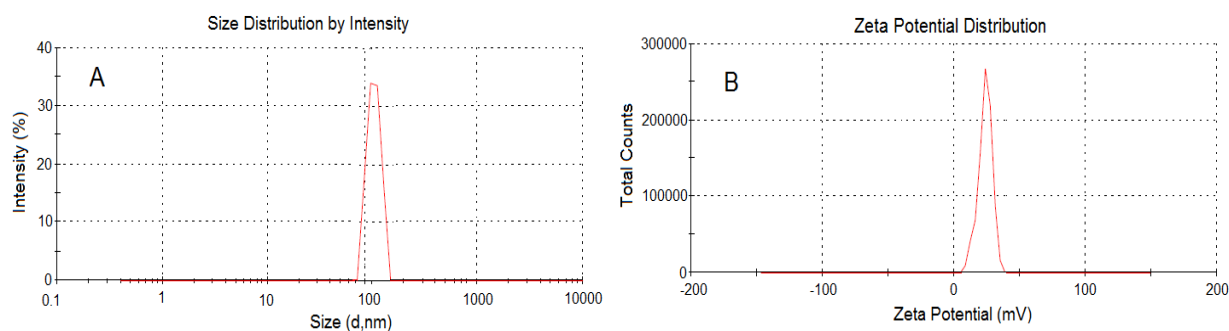

**Figure S1.** Particle size distribution curve from (A), and Surface charge as zeta potential (mV) of  $\beta$ -SIT-Alg/Ch-NPs-FA (B).

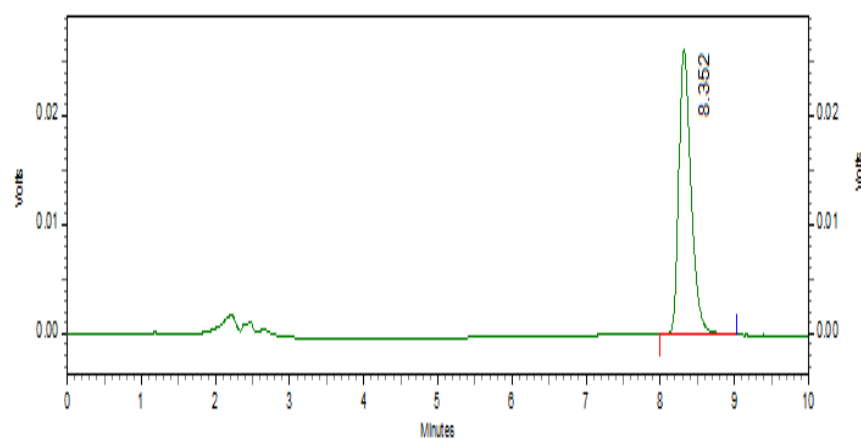

**Figure S2.** A representative chromatogram of  $\beta$ -SIT.
